# Supplementary material
Source: MDPI journal article supplement (https://www.mdpi.com/2073-4352/13/5/826)
Supplement: s1 [file s1]

Archive with 5 entries (5 files):
- crystals-2315115-supplementary.pdf
- Movie S1_a 5.1 Hz.avi
- Movie S2_b 5.3 Hz.avi
- Movie S3_c 5.2 Hz.avi
- Movie S4_d 6.6 Hz.avi
